1 **Trans-ancestral GWAS of alcohol dependence reveals common genetic**  
2 **underpinnings with psychiatric disorders**

3

4 Raymond K. Walters<sup>1</sup>, Mark J. Adams<sup>2</sup>, Amy E. Adkins<sup>3</sup>, Fazil Aliev<sup>4</sup>, Silviu-Alin  
5 Bacanu<sup>5</sup>, Anthony Batzler<sup>6</sup>, Sarah Bertelsen<sup>7</sup>, Joanna M. Biernacka<sup>8</sup>, Tim B. Bigdeli<sup>9</sup>, Li-  
6 Shiun Chen<sup>10</sup>, Toni-Kim Clarke<sup>2</sup>, Yi-Ling Chou<sup>10</sup>, Franziska Degenhardt<sup>11</sup>, Anna R.  
7 Docherty<sup>12</sup>, Pierre Fontanillas<sup>13</sup>, Jerome Foo<sup>14</sup>, Louis Fox<sup>10</sup>, Josef Frank<sup>14</sup>, Ina  
8 Giegling<sup>15</sup>, Scott Gordon<sup>16</sup>, Laura M. Hack<sup>17</sup>, Annette M. Hartmann<sup>15</sup>, Sarah M. Hartz<sup>10</sup>,  
9 Stefanie Heilmann-Heimbach<sup>11</sup>, Stefan Herms<sup>11,18</sup>, Colin Hodgkinson<sup>19</sup>, Per  
10 Hoffmann<sup>11,18</sup>, Jouke Jan Hottenga<sup>20</sup>, Martin A. Kennedy<sup>21</sup>, Mervi Alanne-Kinnunen<sup>22</sup>,  
11 Bettina Konte<sup>15</sup>, Jari Lahti<sup>23,24</sup>, Marius Lahti-Pulkkinen<sup>24</sup>, Lannie Ligthart<sup>20</sup>, Anu  
12 Loukola<sup>22</sup>, Brion S. Maher<sup>25</sup>, Hamdi Mbarek<sup>20</sup>, Andrew M. McIntosh<sup>26</sup>, Matthew B.  
13 McQueen<sup>27</sup>, Yuri Milaneschi<sup>28</sup>, Teemu Palviainen<sup>22</sup>, John F. Pearson<sup>29</sup>, Roseann E.  
14 Peterson<sup>30</sup>, Renato Polimanti<sup>31</sup>, Samuli Ripatti<sup>22</sup>, Euijung Ryu<sup>32</sup>, Nancy L. Saccone<sup>33</sup>,  
15 Jessica E. Salvatore<sup>4,30</sup>, Sandra Sanchez Roige<sup>34</sup>, Melanie Schwandt<sup>35</sup>, Richard  
16 Sherva<sup>36</sup>, Fabian Streit<sup>14</sup>, Jana Strohmaier<sup>14</sup>, Nathaniel Thomas<sup>3</sup>, Jen-Chyong Wang<sup>7</sup>,  
17 Bradley T. Webb<sup>5</sup>, Robbee Wedow<sup>37</sup>, Leah Wetherill<sup>38</sup>, Amanda G. Wills<sup>39</sup>, 23andMe  
18 Research Team<sup># 13</sup>, Jason D. Boardman<sup>37</sup>, Danfeng Chen<sup>40</sup>, Doo-Sup Choi<sup>41</sup>, William E.  
19 Copeland<sup>42</sup>, Robert C. Culverhouse<sup>43</sup>, Norbert Dahmen<sup>44</sup>, Louisa Degenhardt<sup>45</sup>,  
20 Benjamin W. Domingue<sup>46</sup>, Sarah L. Elson<sup>13</sup>, Mark Frye<sup>47</sup>, Wolfgang Gäbel<sup>48</sup>, Marcus  
21 Ising<sup>49</sup>, Emma C. Johnson<sup>10</sup>, Margaret Keyes<sup>50</sup>, Falk Kiefer<sup>51</sup>, John Kramer<sup>52</sup>, Samuel  
22 Kuperman<sup>52</sup>, Susanne Lucae<sup>49</sup>, Michael T. Lynskey<sup>53</sup>, Wolfgang Maier<sup>54</sup>, Karl Mann<sup>51</sup>,  
23 Satu Männistö<sup>55</sup>, Jeanette Nance McClintick<sup>56</sup>, Jacquelyn L. Meyers<sup>57</sup>, Bertram Müller-  
24 Myhsok<sup>58</sup>, John I. Nurnberger<sup>38,59</sup>, Aarno Palotie<sup>1,22,60</sup> Ulrich Preuss<sup>15,61</sup>, Katri  
25 Räikkönen<sup>24</sup>, Maureen D. Reynolds<sup>62</sup>, Monika Ridinger<sup>63</sup>, Norbert Scherbaum<sup>64</sup>, Marc  
26 Schuckit<sup>34</sup>, Michael Soyka<sup>65,66</sup>, Jens Treutlein<sup>14</sup>, Stephanie Witt<sup>14</sup>, Norbert Wodarz<sup>67</sup>,  
27 Peter Zill<sup>66</sup>, Daniel E. Adkins<sup>12,68</sup>, Joseph M. Boden<sup>21</sup>, Dorret Boomsma<sup>20</sup>, Laura J.  
28 Bierut<sup>10</sup>, Sandra A. Brown<sup>34,69</sup>, Kathleen K. Bucholz<sup>10</sup>, Sven Cichon<sup>18</sup>, E. Jane  
29 Costello<sup>42</sup>, Harriet de Wit<sup>70</sup>, Nancy Diazgranados<sup>71</sup>, Danielle M. Dick<sup>3,72</sup>, Johan G.  
30 Eriksson<sup>73</sup>, Lindsay A. Farrer<sup>36,74</sup>, Tatiana M. Foroud<sup>38</sup>, Nathan A. Gillespie<sup>30</sup>, Alison M.  
31 Goate<sup>7</sup>, David Goldman<sup>19,35</sup>, Richard A. Grucza<sup>10</sup>, Dana B. Hancock<sup>75</sup>, Kathleen  
32 Mullan Harris<sup>76</sup>, Andrew C. Heath<sup>10</sup>, Victor Hesselbrock<sup>77</sup>, John K. Hewitt<sup>78</sup>, Christian  
33 Hopfer<sup>79</sup>, John Horwood<sup>21</sup>, William Iacono<sup>50</sup>, Eric O. Johnson<sup>80</sup>, Jaakko A. Kaprio<sup>22,81</sup>,  
34 Victor Karpyak<sup>47</sup>, Kenneth S. Kendler<sup>5</sup>, Henry R. Kranzler<sup>82</sup>, Kenneth Krauter<sup>83</sup>, Paul  
35 Lichtenstein<sup>84</sup>, Penelope A. Lind<sup>16</sup>, Matt McGue<sup>50</sup>, James MacKillop<sup>85</sup>, Pamela A. F.  
36 Madden<sup>10</sup>, Hermine Maes<sup>86</sup>, Patrik Magnusson<sup>84</sup>, Nicholas G. Martin<sup>16</sup>, Sarah E.  
37 Medland<sup>16</sup>, Grant W. Montgomery<sup>87</sup>, Elliot C. Nelson<sup>10</sup>, Markus M. Nöthen<sup>88</sup>, Abraham  
38 A. Palmer<sup>34,89</sup>, Nancy L. Pedersen<sup>84</sup>, Brenda Penninx<sup>28</sup>, Bernice Porjesz<sup>57</sup>, John P.  
39 Rice<sup>10</sup>, Marcella Rietschel<sup>14</sup>, Brien P. Riley<sup>5</sup>, Richard Rose<sup>90</sup>, Dan Rujescu<sup>15</sup>, Pei-Hong  
40 Shen<sup>19</sup>, Judy Silberg<sup>30</sup>, Michael C. Stallings<sup>78</sup>, Ralph E. Tarter<sup>62</sup>, Michael M.  
41 Vanyukov<sup>62</sup>, Scott Vrieze<sup>50</sup>, Tamara L. Wall<sup>34</sup>, John B. Whitfield<sup>16</sup>, Hongyu Zhao<sup>91</sup>,  
42 Benjamin M. Neale<sup>1</sup>, Joel Gelernter<sup>92\*</sup>, Howard J. Edenberg<sup>38,56\*</sup>, Arpana Agrawal<sup>10\*</sup>

43 \*Corresponding authors: Joel Gelernter ([joel.gelernter@yale.edu](mailto:joel.gelernter@yale.edu)); Howard Edenberg  
44 ([edenberg@iu.edu](mailto:edenberg@iu.edu)); Arpana Agrawal ([Arpana@wustl.edu](mailto:Arpana@wustl.edu))

45

46 <sup>1</sup>Analytic and Translational Genetics Unit, Department of Medicine, Massachusetts General  
47 Hospital and Harvard Medical School, Boston, Massachusetts, USA; Stanley Center for  
48 Psychiatric Research, Broad Institute of MIT and Harvard, Cambridge, Massachusetts, USA

49 <sup>2</sup> University of Edinburgh, Division of Psychiatry

50 <sup>3</sup>Department of Psychology & College Behavioral and Emotional Health Institute, Virginia  
51 Commonwealth University

52 <sup>4</sup>Virginia Commonwealth University, Department of Psychology

53 <sup>5</sup>Virginia Commonwealth University Alcohol Research Center; Virginia Institute for Psychiatric  
54 and Behavioral Genetics; Department of Psychiatry, Virginia Commonwealth University

55 <sup>6</sup>Mayo Clinic, Psychiatric Genomics and Pharmacogenomics Program

56 <sup>7</sup>Icahn School of Medicine at Mount Sinai, Department of Neuroscience

57 <sup>8</sup>Mayo Clinic, Department of Health Sciences Research, and Department of Psychiatry and  
58 Psychology

59 <sup>9</sup>Department of Psychiatry and Behavioral Sciences, State University of New York Downstate  
60 Medical Center

61 <sup>10</sup>Washington University School of Medicine, Department of Psychiatry

62 <sup>11</sup>Institute of Human Genetics, University of Bonn; and Department of Genomics, Life & Brain  
63 Center, University of Bonn

64 <sup>12</sup>University of Utah, Department of Psychiatry

65 <sup>13</sup>23andMe, Inc.

66 <sup>14</sup>Department of Genetic Epidemiology in Psychiatry, Central Institute of Mental Health, Medical  
67 Faculty Mannheim, Heidelberg University

68 <sup>15</sup>Martin-Luther-University Halle-Wittenberg, Department of Psychiatry, Psychotherapy and  
69 Psychosomatics

70 <sup>16</sup>QIMR Berghofer Medical Research Institute

71 <sup>17</sup>Department of Psychiatry and Behavioral Sciences, Emory University School of Medicine

72 <sup>18</sup>Human Genomics Research Group, Department of Biomedicine, University of Basel Institute  
73 of Medical Genetics and Pathology, University Hospital Basel

74 <sup>19</sup>NIH/NIAAA, Laboratory of Neurogenetics, NIAAA, NIH, USA

75 <sup>20</sup>Department of Biological Psychology, Amsterdam Public Health Research Institute, Vrije  
76 Universiteit Amsterdam, Amsterdam, the Netherlands

77 <sup>21</sup>University of Otago, Christchurch, New Zealand

78 <sup>22</sup>Institute for Molecular Medicine Finland (FIMM), University of Helsinki, Finland

79 <sup>23</sup>Helsinki Collegium for Advanced Studies, University of Helsinki, Helsinki, Finland

- 80 <sup>24</sup>Department of Psychology and Logopedics, University of Helsinki, Helsinki, Finland
- 81 <sup>25</sup>Johns Hopkins Bloomberg School of Public Health
- 82 <sup>26</sup>University of Edinburgh, Division of Psychiatry; Centre for Cognitive Ageing and Cognitive  
83 Epidemiology
- 84 <sup>27</sup>Department of Integrative Physiology, University of Colorado Boulder
- 85 <sup>28</sup>Department of Psychiatry, Amsterdam Public Health Research Institute, VU University Medical  
86 Center/GGz inGeest, Amsterdam, the Netherlands
- 87 <sup>29</sup>Biostatistics and Computational Biology Unit, University of Otago, Christchurch, New Zealand
- 88 <sup>30</sup>Virginia Commonwealth University, Virginia Institute for Psychiatric and Behavioral  
89 Genetics, Department of Psychiatry
- 90 <sup>31</sup>Department of Psychiatry, Yale School of Medicine and VA CT Healthcare Center, West  
91 Haven, CT, USA
- 92 <sup>32</sup>Mayo Clinic, Department of Health Sciences Research
- 93 <sup>33</sup>Washington University School of Medicine, Department of Genetics
- 94 <sup>34</sup>University of California San Diego, Department of Psychiatry
- 95 <sup>35</sup>NIH/NIAAA, Office of the Clinical Director
- 96 <sup>36</sup>Department of Medicine (Biomedical Genetics), Boston University School of Medicine
- 97 <sup>37</sup>Institute of Behavioral Science and Department of Sociology, University of Colorado
- 98 <sup>38</sup>Indiana University School of Medicine, Department of Medical and Molecular Genetics
- 99 <sup>39</sup>University of Colorado School of Medicine, Department of Pharmacology
- 100 <sup>40</sup>Stanley Center for Psychiatric Research, Broad Institute of MIT and Harvard, Cambridge,  
101 Massachusetts, USA
- 102 <sup>41</sup>Mayo Clinic, Department of Molecular Pharmacology and Experimental Therapeutics
- 103 <sup>42</sup>Duke University Medical Center, Department of Psychiatry and Behavioral Sciences
- 104 <sup>43</sup>Washington University School of Medicine, Department of Medicine and Division of  
105 Biostatistics
- 106 <sup>44</sup>Department of Psychiatry, University of Mainz
- 107 <sup>45</sup>National Drug and Alcohol Research Centre, University of New South Wales
- 108 <sup>46</sup>Stanford University Graduate School of Education
- 109 <sup>47</sup>Mayo Clinic, Department of Psychiatry and Psychology
- 110 <sup>48</sup>Department of Psychiatry and Psychotherapy, University of Düsseldorf
- 111 <sup>49</sup>Max-Planck-Institute of Psychiatry
- 112 <sup>50</sup>University of Minnesota, Department of Psychology
- 113 <sup>51</sup>Department of Addictive Behavior and Addiction Medicine, Central Institute of Mental Health,  
114 Medical Faculty Mannheim, Heidelberg University
- 115 <sup>52</sup>University of Iowa Roy J and Lucille A Carver College of Medicine, Department of Psychiatry

- 116 <sup>53</sup>Addictions Dept, Institute of Psychiatry, Psychology & Neuroscience, King's College London
- 117 <sup>54</sup>Department of Psychiatry, University of Bonn
- 118 <sup>55</sup>Institute for Health and Welfare, Finland
- 119 <sup>56</sup>Indiana University School of Medicine, Biochemistry/Molecular Biology
- 120 <sup>57</sup>Henri Begleiter Neurodynamics Laboratory, Department of Psychiatry and Behavioral
- 121 Sciences, SUNY Downstate Medical Center
- 122 <sup>58</sup>Department of Statistical Genetics, Max-Planck-Institute of Psychiatry
- 123 <sup>59</sup>Department of Psychiatry, Indiana University School of Medicine
- 124 <sup>60</sup>Department of Medicine, Department of Neurology and Department of Psychiatry
- 125 Massachusetts General Hospital, Boston, MA, USA
- 126 <sup>61</sup>Vitos Hospital Herborn, Dept. of Psychiatry and Psychotherapy, Herborn
- 127 <sup>62</sup>University of Pittsburgh, School of Pharmacy
- 128 <sup>63</sup>Department of Psychiatry and Psychotherapy, University of Regensburg Psychiatric Health
- 129 Care Aargau
- 130 <sup>64</sup>LVR-Hospital Essen, Department of Psychiatry and Psychotherapy, Department of Addictive
- 131 Behaviour and Addiction Medicine, Medical Faculty, University of Duisburg-Essen
- 132 <sup>65</sup>Medical Park Chiemseeblick in Bernau-Felden
- 133 <sup>66</sup>Psychiatric Hospital, Ludwig-Maximilians-University
- 134 <sup>67</sup>Department of Psychiatry and Psychotherapy, University of Regensburg
- 135 <sup>68</sup>University of Utah, Department of Sociology
- 136 <sup>69</sup>University of California, San Diego School of Medicine, Department of Psychology
- 137 <sup>70</sup>University of Chicago, Department of Psychiatry and Behavioral Neuroscience
- 138 <sup>71</sup>NIAAA Intramural Research Program
- 139 <sup>72</sup>Department of Human & Molecular Genetics, Virginia Commonwealth University
- 140 <sup>73</sup>Department of General Practice and Primary Health Care, University of Helsinki, Helsinki,
- 141 Finland and National Institute for Health and Welfare, Finland
- 142 <sup>74</sup>Departments of Neurology, Ophthalmology, Epidemiology, and Biostatistics, Boston University
- 143 Schools of Medicine and Public Health
- 144 <sup>75</sup>RTI International, Behavioral and Urban Health Program, Behavioral Health and Criminal
- 145 Justice Division
- 146 <sup>76</sup>Department of Sociology and Carolina Population Center, University of North Carolina at
- 147 Chapel Hill
- 148 <sup>77</sup>University of Connecticut School of Medicine, Department of Psychiatry
- 149 <sup>78</sup>University of Colorado Boulder, Institute for Behavioral Genetics
- 150 <sup>79</sup>University of Colorado Denver, School of Medicine
- 151 <sup>80</sup>RTI International, Fellows Program

- 152 <sup>81</sup>Department of Public Health, University of Helsinki, Helsinki, Finland
- 153 <sup>82</sup>University of Pennsylvania Perelman School of Medicine, Center for Studies of Addiction,  
154 Department of Psychiatry and VISN 4 MIRECC, Crescenzo VAMC
- 155 <sup>83</sup>University of Colorado Boulder, Department of Molecular, Cellular, and Developmental Biology
- 156 <sup>84</sup>Department of Medical Epidemiology and Biostatistics, Karolinska Institutet, Stockholm,  
157 Sweden
- 158 <sup>85</sup>Peter Boris Centre for Addictions Research, McMaster University/St. Joseph's Healthcare  
159 Hamilton; Michael G. DeGroot Centre for Medicinal Cannabis Research
- 160 <sup>86</sup>Virginia Commonwealth University, Virginia Institute for Psychiatric and Behavioral Genetics
- 161 <sup>87</sup>The Institute for Molecular Bioscience, University of Queensland
- 162 <sup>88</sup>Institute of Human Genetics, University of Bonn School of Medicine & University Hospital  
163 Bonn
- 164 <sup>89</sup>University of California San Diego, Institute for Genomic Medicine
- 165 <sup>90</sup>Department of Psychological & Brain Sciences, Indiana University, Bloomington, IN
- 166 <sup>91</sup>Department of Biostatistics, Yale School of Public Health, Yale University
- 167 <sup>92</sup>Departments of Psychiatry, Genetics, and Neuroscience, Yale University School of Medicine;  
168 VA Connecticut Healthcare System
- 169
- 170
- 171
- 172
- 173
- 174
- 175
- 176
- 177
- 178 Keywords: Genome-wide association study, alcoholism, psychiatric disorders, alcohol  
179 use, pleiotropy

180 **ABSTRACT**

181 Liability to alcohol dependence (AD) is heritable, but little is known about its complex  
182 polygenic architecture or its genetic relationship with other disorders. To discover loci  
183 associated with AD and characterize the relationship between AD and other psychiatric  
184 and behavioral outcomes, we carried out the largest GWAS to date of DSM-IV  
185 diagnosed AD. Genome-wide data on 14,904 individuals with AD and 37,944 controls  
186 from 28 case/control and family-based studies were meta-analyzed, stratified by genetic  
187 ancestry (European, N = 46,568; African; N = 6,280). Independent, genome-wide  
188 significant effects of different *ADH1B* variants were identified in European (rs1229984; p  
189 = 9.8E-13) and African ancestries (rs2066702; p = 2.2E-9). Significant genetic  
190 correlations were observed with schizophrenia, ADHD, depression, and use of  
191 cigarettes and cannabis. There was only modest genetic correlation with alcohol  
192 consumption and inconsistent associations with problem drinking. The genetic  
193 underpinnings of AD only partially overlap with those for alcohol consumption,  
194 underscoring the genetic distinction between pathological and non-pathological drinking  
195 behaviors.

196

197

198

199

200

201

202

203

204

205

206

207

208

## 209 INTRODUCTION

210 Excessive alcohol use is a leading contributor to morbidity and mortality. One in 20  
211 deaths worldwide is attributable to alcohol consumption, as is 5.1% of the global burden  
212 of disease<sup>1</sup>. Alcohol dependence (AD), as defined by the Fourth Edition of the American  
213 Psychiatric Association Diagnostic and Statistical Manual of Mental Disorders (DSM-  
214 IV)<sup>2</sup>, is a serious psychiatric disorder characterized by tolerance, withdrawal, loss of  
215 control over drinking and excessive alcohol consumption despite negative health and  
216 social consequences. Among alcohol drinkers, 12% meet criteria for DSM-IV AD during  
217 their lifetimes<sup>3</sup>. In the United States, only 25% of those with AD ever receive  
218 treatment<sup>4,5</sup>.

219

220 AD is moderately heritable (49% by a recent meta-analysis)<sup>6</sup> and numerous genome-  
221 wide association studies (GWAS) have aimed to identify loci contributing to this genetic  
222 variance (see<sup>7</sup> for a review). According to one study, common SNPs are responsible for  
223 as much as 30% of the variance in AD<sup>8</sup>, but few have been identified to date. Variants in  
224 the genes responsible for alcohol metabolism<sup>9–19</sup> (*ADH1B* and, to a lesser extent,  
225 *ADH1C* and others<sup>20–22</sup>, e.g., *ADH4*) have been strongly implicated, initially in East-  
226 Asians<sup>9,11,12</sup> and more recently in people of European origin (EU) and in African-  
227 Americans (AAs)<sup>13–15</sup>. The association between AD (and related problem drinking  
228 phenotypes) and rs1229984, a missense SNP (Arg48His) in *ADH1B* that affects the  
229 conversion of alcohol to acetaldehyde, represents one of the largest common-variant  
230 effect sizes observed in psychiatry, with the His48 allele accelerating ethanol  
231 metabolism and affording approximately 3-fold reduction in likelihood of AD across  
232 numerous studies (e.g.,<sup>14,23,24</sup>). Another functional polymorphism, rs671 in *ALDH2*  
233 (Glu504Lys), strongly affects alcohol metabolism by blocking conversion of  
234 acetaldehyde to acetate, but is rare except in some Asian populations<sup>9–11,17,18</sup>. *ADH1B*

235 and *ALDH2* polymorphisms, however, only explain a small proportion of the heritable  
236 variation in AD in populations of European ancestry.

237

238 In this study, we compiled the largest numbers of carefully diagnosed alcohol  
239 dependent individuals and alcohol-exposed controls to date, from both case-control and  
240 family studies. These included substantial numbers of both European ancestry (EU, N =  
241 46,568, including 38,686 unrelated individuals) and African-American ancestry (AA, N =  
242 6,280, including 5,799 unrelated individuals) subjects. Each study was subjected to  
243 stringent quality control (QC) before conducting GWAS within each population of each  
244 study, followed by a genome-wide meta-analysis. We estimated the heritability (SNP- $h^2$ )  
245 of AD and examine the extent to which aggregate genetic variation in AD is related to  
246 traits from 42 other GWAS, including continuous measures of alcohol consumption.

247

## 248 **METHODS**

249

250 *Samples:* We collected individual genotypic data from 14 case/control studies and 9  
251 family-based studies and summary statistics from GWAS of AD from 5 additional  
252 cohorts (**Table 1**; see **Supplementary Information** for cohort descriptions). AD was  
253 defined as meeting criteria for a DSM-IV (or DSM-III-R in one instance) diagnosis of AD.  
254 Excepting three cohorts with population-based controls (N=7,015), all controls were  
255 screened for AD. Individuals with no history of drinking alcohol and those meeting  
256 criteria for DSM-IV alcohol abuse were additionally excluded as controls where  
257 applicable (**Supplementary Information**).

258

259 *Quality control and imputation:* Data for the genotyped cohorts that shared raw data  
260 were deposited to a secure server for uniform quality control (QC). QC and imputation  
261 of the 14 case/control studies was performed using the ricopili pipeline  
262 (<https://github.com/Nealelab/ricopili>). For 9 family-based cohorts, an equivalent pipeline,



263 picopili (<https://github.com/Nealelab/picopili>), was developed for QC, imputation, and  
264 analysis appropriate for diverse family structures, including twins, sibships and  
265 extended pedigrees (**Supplementary Information**).

266

267 After initial sample and variant QC, principal components analysis (PCA) was used to  
268 identify population outliers for exclusion and to stratify samples in each study by  
269 continental ancestry. Identified EU and AA ancestry populations were confirmed by PCA  
270 with the 1000 Genomes reference panel<sup>25</sup>. Final sample and variant QC, including filters  
271 for call rate, heterozygosity, and departure from Hardy-Weinberg equilibrium (HWE),  
272 was then performed within each ancestry group in each cohort (see **Supplementary**  
273 **Information**). Samples were also filtered for cryptic relatedness within and between  
274 cohorts and for departures from reported pedigree structures.

275

276 Each cohort was imputed using SHAPEIT<sup>26</sup> and IMPUTE2<sup>27</sup>, using the cosmopolitan (all  
277 ancestries) 1000 Genomes reference panel. Consistency of minor allele frequencies  
278 (MAF) with the reference panel was verified prior to imputation, with SNPs in EU  
279 cohorts compared to MAF in European population samples and AA cohorts compared  
280 to MAF in African population samples. Imputed SNPs were then filtered for INFO score  
281 > 0.8 and allele frequency > 0.01 prior to analysis.

282

283 *Association Analysis:* A GWAS for AD status was performed within each ancestry  
284 stratum of each sample using an association model appropriate for the study design  
285 (**Table 1**). For case/control studies, GWAS was performed using logistic regression with  
286 imputed dosages. For family-based studies of small, simple pedigrees (e.g., sibships),  
287 association with imputed genotypes was tested using generalized estimating equations  
288 (GEE). For more complex pedigrees, imputed genotypes were tested using logistic  
289 mixed models. Sex was included as a covariate, along with principal components to  
290 control for population structure (**Supplementary Information**). Details of the analytic

291 model, software used, effective N, number of SNPs and principal components are  
292 presented for each sample in Supplementary **Table S1**.

293

294 In addition to this primary analysis, subsets of genetically unrelated individuals were  
295 selected from each family-based cohort (i.e. taking one individual per family) and used  
296 to perform a conventional case/control GWAS using logistic regression. This was used  
297 in place of the family-based GWAS for estimation of effect sizes and inclusion in  
298 estimation of SNP- $h^2$  and genetic correlations ( $r_g$ ) using LD score regression analyses.

299

300 *Meta-analysis:* The primary discovery meta-analysis of all ancestry-stratified GWAS  
301 ( $N_{\text{case}} = 14,904$ ;  $N_{\text{control}} = 37,994$ ) was conducted in METAL<sup>28</sup>. As the different study  
302 designs (family vs. case-control) produced effect sizes that were not comparable,  
303 results were combined using weighting by effective sample size (see **Supplementary**  
304 **Information**). Separate ancestry-specific discovery meta-analyses of EU ( $N = 46,568$ )  
305 and AA ( $N = 6,280$ ) cohorts, respectively, were also performed. Heterogeneity was  
306 evaluated across all cohorts and between study design subsets (**Supplementary**  
307 **Information**). Power analysis was performed using CaTS<sup>29</sup> with the estimated effective  
308 sample size.

309

310 In addition to the discovery meta-analyses, we conducted meta-analyses for two design  
311 subsets. First, we performed sample size weighted meta-analysis of the subset of  
312 genetically unrelated individuals in EU ( $N = 38,686$ ) and AA ( $N = 5,799$ ) cohorts for use  
313 in LD score regression (LDSR) analysis. Second, we performed inverse-variance  
314 weighted meta-analysis of genetically unrelated individuals in genotyped cohorts to  
315 estimate within-ancestry effect sizes for EU ( $N = 28,757$ ) and AA ( $N = 5,799$ ). These  
316 effect sizes were then used to compare trans-ancestral fine mapping results using  
317 inverse-variance weighted fixed effects, random effects<sup>30</sup>, and Bayesian<sup>31</sup> models

318 **(Supplementary Information)**. Supplementary **Table S2** provides an overview of the  
319 various meta-analytic models that were fitted to data.

320

321 *Heritability and Genetic Correlation Analysis:* LDSR analysis<sup>32</sup> was performed to  
322 estimate the heritability explained by common SNPs in meta-analyses of unrelated EU  
323 and AA samples, respectively. LDSR was performed using HapMap3 SNPs and LD  
324 scores computed from 1000 Genomes reference samples corresponding to each  
325 population (Supplementary Information). Conversion of  $h^2_g$  estimates from observed to  
326 liability scale was performed assuming population prevalences of 0.159 and 0.111 for  
327 AD in alcohol-exposed EU and AA individuals, respectively<sup>3</sup>.

328

329 Genetic correlation between AD and 42 traits from LD Hub<sup>33</sup> and other published  
330 studies<sup>34–44</sup> was examined with the same unrelated EU meta-analysis (10,206 cases  
331 and 28,480 controls) and precomputed European LD scores using LDSR. To avoid  
332 increasing the multiple testing burden, redundant or highly-correlated phenotypes were  
333 reduced by manually selecting the version of the phenotype with the greatest predicted  
334 relevance to AD, largest sample size, or highest heritability (**Supplementary**  
335 **Information**).

336

337 *Replication:* As described below, a locus on chromosome 3 was genome-wide  
338 significant (GWS) in the trans-ancestral discovery meta-analysis. The minor allele,  
339 associated with lower AD risk in our analysis, had low frequency in all EU samples  
340 except the Finnish cohorts; it was also higher in AAs. To seek replication, we examined  
341 the association between this locus and DSM-IV AD in two independent AA samples  
342 (Yale-Penn 2, n = 911 cases and 599 controls, and COGA AAfGWAS, n = 880 cases  
343 and 1,814 controls; Supplementary Information) using GEE (Yale-Penn) and Genome-  
344 Wide Association/Interaction Analysis and Rare Variant Analysis with Family Data  
345 (GWAF; in COGA) respectively. Association with AD status, broadly defined using

346 hospital and death records, was also examined in the FINRISK cohort (1,232 cases and  
347 22,614 controls) using Firth logistic regression<sup>45</sup>.

348

## 349 RESULTS

350

351 **GWAS meta-analyses:** In both the EU and AA analyses, GWS loci ( $p < 5E-8$ ) were  
352 identified in the ADH gene cluster on chromosome 4 (**Figure 1** for Manhattan plot;  
353 **Table 2** for top loci; Supplementary **Figure S1** for QQ plot for discovery GWAS showing  
354 polygenic signal). Examining individual populations, rs1229984 in *ADH1B* was the  
355 strongest associated signal from the analysis in EU ( $p = 9.8E-13$ ), while rs2066702, also  
356 in *ADH1B*, was the most significant variant in AA ( $p = 2.2E-9$ ; **Figure 2** shows the  
357 regional association plots for the *ADH1B* locus for the discovery, EU, AA and trans-  
358 ancestral meta-analysis). Clumping for linkage disequilibrium (LD;  $r^2 < .1$  within 500kb)  
359 suggested multiple independent signals within this locus in both populations (**Table 2**),  
360 with differing leading alleles reflecting different LD structures and allele frequencies in  
361 each population (Supplementary **Figure S2A** and **S2B** show LD patterns in the ADH  
362 locus, including *ADH1B*, in AA and EU respectively). Conditional analysis controlling for  
363 rs2066702 (Supplementary **Figure S3** for results in AA) and rs1229984 (Supplementary  
364 **Figure S4** for results in EU) was inconclusive due to limited power, but was tentatively  
365 consistent with the existence of additional independent effects in the region  
366 (Supplementary **Table S3** shows marginal and conditional effect sizes for genome-wide  
367 significant SNPs in the *ADH1B* locus). The most promising support for an independent  
368 signal arises from rs894368 (marginal odds ratio = 0.887,  $p = 6.9E-7$ ; conditional odds  
369 ratio = 0.890,  $p = 6.8E-6$ ; Supplementary Information). Results from the trans-ancestral  
370 meta-analysis reinforced the robust effects of rs1229984 and other *ADH1B* SNPs on  
371 liability to AD (regional association plot for rs1229984 in Supplementary **Figure S5A**  
372 (inverse-variance weighted), **S5B** (modified random-effects) and **S5C** (Bayesian))  
373 across various analytic models.

374

375 We also verified whether variants affecting *ADH1B* expression (eQTLs) were associated  
376 with AD. Considering GTEx data V7 (available at <https://www.gtexportal.org/>), 263  
377 variants were reported to affect *ADH1B* expression in different human tissues (FDR  
378  $q < 0.05$ ). After LD-informed clumping and the exclusion of variants in LD with the GWS  
379 coding alleles (i.e., rs1229984 and rs2066702), three variants (i.e., rs11939328,  
380 rs10516440, rs7664780) were considered with respect to their association with AD.  
381 SNP rs10516440 showed a genome-wide significant association with AD with  
382 contribution from both AA and EU analyses (trans-ancestry  $p = 4.72E-8$ ; EU  $p = 3.97E-$   
383  $6$ ; AA  $p = 1.97E-3$ ). In line with the effect of the coding variants where the protective  
384 allele is associated with increased *ADH1B* enzymatic activity, the rs10516440\*A allele  
385 was associated with reduced AD risk and increased *ADH1B* expression, which was  
386 consistent across multiple tissues (multi-tissue  $p = 1.42E-76$ ).

387

388 A novel locus on chromosome 3, rs7644567, also achieved GWS in the meta-analysis  
389 ( $p = 3.03E-8$ ; Supplementary **Figure S6** for regional association plot), primarily  
390 attributable to contributions from the AA samples ( $p = 6.64E-6$ ) with the major, A, allele  
391 being associated with AD risk liability. The G allele has an MAF = 0.29 in AA, but  
392 MAF < 0.01 in most EU samples, except in FinnTwin (MAF = .032) and NAG-Fin (MAF =  
393 0.054). In AA, rs7644567 does not appear to be in high LD with other variants  
394 (Supplementary **Figure S6**) and did not replicate in two independent AA samples. In the  
395 independent FINRISK cohort (MAF = .045), there was modest evidence for association  
396 ( $p = 0.019$ ), but with risk associated with the minor G allele (**Supplementary Table S4**  
397 for results in each replication sample).

398

399 Overall, there was limited evidence for heterogeneity across all cohorts, within ancestry,  
400 between ancestries, or between study designs within ancestry (**Supplementary**  
401 **Information**; Supplementary **Figure S7-S13**). Gene-level association testing with

402 MAGMA<sup>46</sup> did not identify any additional genes in EU or AA (Supplementary **Table S5**  
403 for top 20 genes in EU and AA).

404

405 **Heritability and genetic correlations:** LD score based liability-scale SNP-heritability of  
406 AD was estimated at  $h^2_g = 0.090$  (SE = 0.019,  $p = 8.02E-7$ ) in the meta-analysis of  
407 unrelated EU samples. Exclusion of the *ADH1B* locus did not substantially modify this  
408 estimate ( $h^2_g = 0.089$ , SE = 0.0185). Nominally significant heritability from common  
409 variants was also estimated for the meta-analysis of unrelated AA individuals based on  
410 LDSR with scores computed from 1000 Genomes African populations ( $p = .017$ ), but the  
411 quantitative estimate of  $h^2_g$  was unstable depending on the choice of reference panel,  
412 reflecting the challenge of correctly specifying LDSR and robustly modelling LD for the  
413 admixed AA population (**Supplementary Information**).

414

415 Significant genetic correlation with AD in EU was observed for 16 traits (significant  
416 genetic correlations in **Figure 3**; all genetic correlations in Supplementary **Table S6**),  
417 after correction for multiple testing ( $p = 1.19E-3$  for 42 traits). The largest positive  
418 correlations were with ever smoking tobacco ( $r_g = .708$ ,  $p = 1.3E-7$ ) and lifetime  
419 cannabis use ( $r_g = .793$ ,  $p = 2.5E-4$ ), and with other psychiatric disorders and traits,  
420 especially schizophrenia ( $r_g = 0.357$ ,  $p = 3.2E-11$ ), ADHD ( $r_g = .444$ ,  $p = 4.2E-6$ ), and  
421 depressive symptoms ( $r_g = .603$ ,  $p = 2.6E-7$ ). Educational attainment ( $r_g = -0.424$ ,  $p =$   
422  $6.8E-9$ ) and age at first birth (higher values indicate that subjects were older when they  
423 had their first child,  $r_g = -0.63$ ,  $p = 2.0E-9$ ) showed significant inverse genetic correlation  
424 with AD suggesting that liability to AD risk was genetically related to lower educational  
425 attainment and lower age at which one had their first child.

426

427 Unexpected patterns of genetic correlation were observed when comparisons were  
428 made to other alcohol-related measures. AD was genetically correlated with alcohol  
429 consumption in a meta-analysis of the Alcohol Genome-wide Association (AlcGen) and

430 Cohorts for Aging and Research in Genomic Epidemiology Plus (CHARGE+)  
431 consortia<sup>36</sup> ( $rg = .695$ ,  $p = 6.9E-6$ ) but only modestly with alcohol consumption from the  
432 recent large UK Biobank analysis<sup>37</sup> ( $rg = 0.371$ ,  $p = 5.2E-5$ ). Liability to AD was not  
433 correlated with genome-wide SNPs from a recent GWAS of the Alcohol Use Disorders  
434 Identification Test (AUDIT) in 23andMe<sup>38</sup> ( $rg = 0.076$ ,  $p = 0.65$ ), perhaps due to the low  
435 levels of drinking observed in this population<sup>38</sup>. Additional analysis indicates AD is  
436 genetically correlated with GWAS of delay discounting in the 23andMe sample<sup>42</sup> ( $rg =$   
437  $0.478$ ,  $p = 6.0E-3$ ), suggesting behavioral phenotypes in the cohort are still informative  
438 to AD.

439

440 **Associations with other GWS loci:** We examined results for the eight independent  
441 variants associated at GWS levels with alcohol consumption in the UK Biobank<sup>37</sup>  
442 (**Supplementary Table S7**). Among the UK Biobank findings, three of the four reported  
443 variants in the ADH region of chromosome 4 (rs145452708 – a proxy for rs1229984,  
444 rs29001570 and rs35081954) were associated in the present study with AD ( $p$  ranging  
445 from  $3.5E-5$  –  $2.3E-10$ ) with sign concordant effects; the remaining variant was  
446 excluded from our analysis due to  $MAF < 0.01$ . The UK Biobank lead variant in *KLB*,  
447 rs11940694, was nominally associated with AD ( $p = .0097$ ), though this does not  
448 surpass multiple testing correction for the eight GWS alcohol consumption loci. We see  
449 little evidence ( $p > 0.2$ ) for association of AD with the reported loci at *GCKR* and  
450 *CADM2*, which may be due to differences in power for the given effect size or because  
451 these genes exert an influence on liability to consume alcohol but not later problems.  
452 The locus on chromosome 18 showed limited regional association with AD, but the  
453 index variant was not present in our analysis because it no longer appears in the 1000  
454 Genomes Phase 3 reference panel<sup>25</sup>.

455

456 **Power analysis:** Only 3 additional loci reach  $p < 1E-6$  (**Table 2**). Power analyses  
457 indicated that the current meta-analysis is expected to have at least 63% power to  
458 detect very common variants ( $MAF \geq 0.25$ ) with odds ratios  $\geq 1.10$  at  $p < 1E-6$  (41% for

459  $p < 5E-8$ ; **Supplementary Figure S14** for power analysis curves). Power is lower for  
460 less common variants ( $MAF \geq .05$ ) even with odds ratios  $\geq 1.20$  at  $p < 1E-6$  (60% power)  
461 and  $p < 5E-8$  (38% power).

462

## 463 **DISCUSSION**

464

465 To our knowledge, this is the largest GWAS of rigorously-defined AD. We identified loci  
466 in *ADH1B* that differed between EU and AA, as well as novel genetic correlations  
467 between AD and psychiatric disorders (e.g., schizophrenia), tobacco and cannabis use,  
468 and behavioral outcomes (e.g., educational attainment). Analyses also revealed a  
469 genetic distinction between GWAS results for alcohol consumption and AD. Although  
470 larger sample sizes can be amassed by focusing on quantitative measures of  
471 consumption, only the upper tail is relevant to AD (as a medical diagnosis) and even  
472 that does not capture other aspects of disordered drinking (e.g., loss of control,  
473 withdrawal) directly. Conversely, cases derived from electronic medical records (e.g.,  
474 ICD codes) may result in a high rate of false negatives, while self-screening instruments  
475 (e.g. AUDIT scores) is best suited to analyses of disordered drinking when a sufficiently  
476 high threshold or score cut-off is applied to pinpoint severity. Our study has the  
477 advantage of greater diagnostic precision via use of semi-structured interviews to  
478 diagnose AD systematically in a majority of the constituent studies.

479

480 The genome-wide significant SNPs reaffirm the importance of functional variants  
481 affecting alcohol metabolism to the risk of AD. The top association in *ADH1B*,  
482 rs1229984, is a missense variant that is amongst the most widely studied in relation to  
483 alcohol use, misuse and dependence. The resulting amino acid substitution (Arg48His)  
484 increases the rate at which ADH1B oxidizes ethanol to acetaldehyde<sup>10,11</sup>. Early studies  
485 on Asian populations in which the derived allele is common demonstrated strong  
486 protection against the development of AD<sup>9-11</sup>. In EUs and AAs, the protective allele is



487 present at much lower frequencies (EU MAF = 3-4%, AA MAF < 1%), but recent large-  
488 scale studies have shown an association between this locus and alcohol consumption  
489 and problems at GWS levels in EU with similar effect size<sup>14,15</sup>. The lead variant in AA  
490 cohorts, rs2066702 (Arg370Cys), is another functional missense variant in *ADH1B*, and  
491 it, similarly, encodes an enzyme with an increased rate of ethanol oxidation<sup>10,11</sup>. The  
492 allele encoding Cys370 is common among AAs, but rare in other populations<sup>10</sup>. Our  
493 results clearly show that these two different functional SNPs in *ADH1B* both affect risk  
494 for alcoholism, with their relative importance dependent upon allele frequency in the  
495 population studied. Larger future studies will be needed to evaluate the evidence for  
496 additional independent effects in the chromosome 4 locus.

497

498 The only other locus to reach significance was rs7644567 on chromosome 3, primarily  
499 driven by AA cohorts due to the variant's very low MAF in EU. This locus did not  
500 replicate in independent African or Finnish ancestry samples. We note that the  
501 conventional genome-wide significance threshold is derived for European ancestry  
502 samples, and thus is likely to be too lenient in GWAS of African-ancestry cohorts due to  
503 higher genetic diversity and corresponding increase in the effective number of  
504 independent tests in the GWAS<sup>47,48</sup>. As an illustration, in 4 samples from the current  
505 study that included both EU and AA participants, the number of independent SNPs  
506 identified upon LD pruning was 1.7- to 2.3-fold greater in AA than EU subjects. Much  
507 larger studies in AA and other non-EU populations will clearly be important to elucidate  
508 additional loci.

509

510 Despite limited SNP-level findings, there is significant evidence for polygenic effects of  
511 common variants in both EU and AA cohorts. The estimated  $h^2_g = .09$  for AD in EU is  
512 only modestly lower than those recently reported for alcohol consumption ( $h^2_g = .13$ )<sup>37</sup>  
513 and AUDIT scores ( $h^2_g = .12$ )<sup>38</sup>, and comparable to estimates derived for cigarettes-per-  
514 day<sup>33</sup>. Our  $h^2_g$  estimate is lower than a prior report<sup>8</sup>, likely reflecting a combination of  
515 differences in estimation method and greater heterogeneity in ascertainment strategy

516 across samples in the current study. The latter is especially relevant given that we  
517 incorporated population-based cohorts with a wide range of ages at ascertainment and  
518 cultural environments, as well as cohorts enriched for other substance use disorders.

519

520 Comparing our GWAS to recent GWAS of alcohol consumption measures suggests that  
521 the liability underlying normative patterns of alcohol intake and AD are only partially  
522 overlapping. Genome-wide, we observe only modest genetic correlation (significantly <  
523 1) with log-scaled alcohol consumption by participants in AlcGen and CHARGE+  
524 Consortia cohorts<sup>36</sup> ( $r_g = .695$ ) and in the UK Biobank<sup>37</sup> ( $r_g = .371$ ), and no significant  
525 correlation with GWAS of log-scaled AUDIT scores in 23andMe participants<sup>38</sup> ( $r_g =$   
526  $.076$ ). We also observe only partial replication of the 8 loci significantly associated with  
527 consumption in the UK Biobank. One key factor in interpreting the differences between  
528 these traits and AD is that the distribution of consumption levels and AUDIT scores can  
529 be highly skewed in population samples, with most individuals at the low  
530 (nonpathological) end of the spectrum. This effect may be especially pronounced  
531 among the older, healthy volunteers of the UK Biobank cohort<sup>49</sup> and the 23andMe  
532 cohort, which is more educated and has higher socioeconomic status than the general  
533 US population<sup>38</sup>. We hypothesize that the variants that affect consumption at lower  
534 levels may differ substantively from those that affect very high levels of consumption in  
535 alcohol dependent individuals, who are also characterized by loss of control over  
536 intake<sup>50</sup>. This appears to be the case in one prior study that used specific cut-offs to  
537 harmonize AUDIT scores with AD data and noted significant concordance in SNP- $h^2$   
538 estimates<sup>51</sup> – according to that study, the optimal cutoffs for their sample were  $\geq 6$  and  
539  $\geq 9$  for women and men respectively. However, there is a need for a further detailed  
540 characterization of how AUDIT cut-offs may be applied to maximize concordance with  
541 genetic liability to AD diagnosis risk. The strongly negative genetic correlation between  
542 educational attainment and AD, in contrast to positive genetic correlations of education  
543 with consumption and AUDIT scores, further underscore this distinction between

544 normative/habitual levels of alcohol intake and diagnosed AD, at least in the respective  
545 populations studied.

546

547 The current analysis also identified robust genetic correlation of AD with a broad variety  
548 of psychiatric outcomes. This correlation is strongest for aspects of negative mood,  
549 including neuroticism and major depressive disorder, as also seen in twin studies<sup>52,53</sup>  
550 and through recent specific molecular evidence for pleiotropy<sup>54,55</sup>. Taken together with  
551 evidence from other recent genomic studies<sup>54</sup>, and null correlations for other GWAS of  
552 alcohol consumption, these findings suggest that major depression may only share  
553 genetic liability with alcohol use at pathological levels.

554

555 AD was also negatively genetically correlated with AFB, which is an indicator of  
556 reproductive tempo and correlated with age at first consensual sexual intercourse<sup>56</sup>.  
557 This is consistent with evidence of common genetic liability to early, risky behaviors  
558 underlying AD and AFB<sup>57</sup>. Nominally significant genetic correlation with delay  
559 discounting (i.e. favoring immediate rewards) and the strong genetic correlation of AD  
560 with ADHD, cigarette smoking and cannabis use may similarly reflect a shared genetic  
561 factor for risk-taking and reduced impulse control.

562

563 Lower genetic correlations were observed for most biomedical and anthropometric  
564 outcomes. Liver enzymes GGT and ALT, once proposed as possible biomarkers for  
565 alcohol abuse<sup>58</sup>, showed, as expected, nominal evidence for genetic correlation with AD  
566 but neither survived multiple testing correction. Notably, we did not find any association  
567 between AD and body-mass index (BMI). Negative genetic correlations with BMI were  
568 previously reported for both alcohol consumption<sup>37</sup> and AUDIT scores<sup>38</sup>, but there is  
569 prior evidence that BMI has differing underlying genetic architecture in the context of AD  
570 and outside of that context<sup>59</sup>. The negative genetic correlations observed in those  
571 studies are consistent with studies of light to moderate drinking, which is also

572 associated with healthier lifestyle behaviors, while heavy and problematic drinking is  
573 typically associated with weight gain<sup>60</sup>.

574

575 This study benefits from precision in diagnostic assessment of AD, known alcohol  
576 exposure in a majority of the controls, and careful quality control that excluded overlaps  
577 of individuals between studies while combining case-control and twin/family-based  
578 study designs. Despite these strengths our sample size was insufficient to identify  
579 additional GWS loci robustly. Power analyses indicate that additional SNPs associated  
580 with AD are likely to have small effect sizes, consistent with other psychiatric disorders  
581 (e.g. depression<sup>61</sup>). This supports the pressing need for collection of large numbers of  
582 well characterized cases and controls. The differences between our results and the  
583 study of AUDIT scores<sup>38</sup>, however, highlight that ascertainment and trait definition must  
584 also be taken into account. Careful study of how screening tools, such as the AUDIT,  
585 correlate to genetic liability to AD (as defined by DSM-IV or similar) could substantially  
586 boost sample sizes for future AD GWAS. There is also a continued need to characterize  
587 the genetic architecture of AD in non-EU populations.

588

589 We show a novel genetic distinction between drinking in the pathological range (AD)  
590 and habitual drinking that does not cross the threshold into pathology or dependence.  
591 Larger future samples will allow us to uncover additional pleiotropy between  
592 pathological and non-pathological alcohol use as well as between AD and other  
593 neuropsychiatric disorders.

594

595

596

597

598

**Table 1:** Descriptive statistics for cohorts in the meta-analysis of AD.

| Dataset                                                                             | PMID     | Male (%) | Ages (years) | European (EU) |              |              |              | African - American (AA) |             |             |             |
|-------------------------------------------------------------------------------------|----------|----------|--------------|---------------|--------------|--------------|--------------|-------------------------|-------------|-------------|-------------|
|                                                                                     |          |          |              | N Total       |              | N Unrelated  |              | N Total                 |             | N Unrelated |             |
|                                                                                     |          |          |              | Case          | Control      | Case         | Control      | Case                    | Control     | Case        | Control     |
| <b>Case-control: Logistic Regression</b>                                            |          |          |              |               |              |              |              |                         |             |             |             |
| Comorbidity and Trauma Study (CATS)                                                 | 23303482 | 56%      | 18-67        | 572           | 817          | 572          | 817          | --                      | --          | --          | --          |
| Christchurch Health and Development Study (CHDS)                                    | 23255320 | 48%      | 16-30        | 112           | 500          | 112          | 500          | --                      | --          | --          | --          |
| Collaborative Study of the Genetics of Alcoholism - case-control cohort (COGA-cc)   | 20201924 | 54%      | 18-79        | 583           | 363          | 583          | 363          | --                      | --          | --          | --          |
| Family Study of Cocaine Dependence (FSCD)                                           | 18243582 | 51%      | 18-60        | 266           | 174          | 266          | 174          | 255                     | 241         | 255         | 241         |
| German Study of the Genetics of Alcoholism (GESGA)                                  | 19581569 | 65%      | 18-84        | 1314          | 2142         | 1314         | 2142         | --                      | --          | --          | --          |
| Gene-Environment Development Initiative - Great Smoky Mountains Study (GEDI-GSMS)   | 8956679  | 57%      | 9-26         | 42            | 565          | 42           | 565          | --                      | --          | --          | --          |
| Center on Antisocial Drug Dependence (CADD)                                         | 25637581 | 70%      | 13-20        | 400           | 577          | 400          | 577          | 51                      | 51          | 51          | 51          |
| Phenomics and Genomics Sample (PAGES)                                               | 28371232 | 57%      | 18-74        | 37            | 523          | 37           | 523          | --                      | --          | --          | --          |
| Collaborative Study on the Genetics of Nicotine Dependence (COGEND Nico)            | 17158188 | 34%      | 25-82        | 135           | 272          | 135          | 272          | 46                      | 232         | 46          | 232         |
| COGEND - Study of Addiction: Genetics and Environment (COGEND SAGE)                 | 20202923 | 37%      | 18-77        | 311           | 225          | 311          | 225          | 104                     | 103         | 104         | 103         |
| Spit For Science                                                                    | 24639683 | 36%      | >18          | 252           | 1863         | 252          | 1863         | 74                      | 841         | 74          | 841         |
| National Institute on Alcohol Abuse and Alcoholism Intramural (NIAAA)               | n/a      | 67%      | >18          | 442           | 206          | 442          | 206          | 404                     | 110         | 404         | 110         |
| Mayo Clinic Center for the Individual Treatment of Alcohol Dependence (CITA)        | 25290263 | 55%      | ≥18          | 378           | 646          | 378          | 646          | --                      | --          | --          | --          |
| Alcohol Dependence in African Americans (ADAA)                                      | n/a      | 57%      | 18-69        | --            | --           | --           | --           | 794                     | 297         | 794         | 297         |
| <b>Family-based, twins and sibs: GEE</b>                                            |          |          |              |               |              |              |              |                         |             |             |             |
| Brisbane Longitudinal Twin Study (BLTS)                                             | 23187020 | 43%      | 18-30        | 60            | 938          | 51           | 546          | --                      | --          | --          | --          |
| GEDI - Virginia Twin Study on Adolescent Behavioral Development (GEDI-VTSABD)       | 9294370  | 38%      | 8-32         | 209           | 503          | 188          | 318          | --                      | --          | --          | --          |
| Minnesota Center for Twin and Family Research (MCTFR)                               | 23942779 | 41%      | 16-21        | 609           | 2100         | 553          | 1274         | --                      | --          | --          | --          |
| Center for Education and Drug Abuse Research (CEDAR)                                | 21514569 | 63%      | 16-34        | 59            | 200          | 54           | 152          | --                      | --          | --          | --          |
| Swedish Twin Registry (STR)                                                         | 23137839 | 47%      | 40-83        | 76            | 8311         | 76           | 6112         | --                      | --          | --          | --          |
| Yale-Penn                                                                           | 24166409 | 58%      | 16-79        | 1094          | 301          | 1004         | 252          | --                      | --          | --          | --          |
| <b>Family-based, large/complex pedigrees: Logistic Mixed Model</b>                  |          |          |              |               |              |              |              |                         |             |             |             |
| Collaborative Study of the Genetics of Alcoholism - family cohort (COGA-fam)        | 23089632 | 45%      | 12-88        | 605           | 682          | 168          | 138          | --                      | --          | --          | --          |
| Australian Alcohol and Nicotine Studies (OZ-ALC-NAG)                                | 21529783 | 45%      | 18-82        | 1571          | 3069         | 1111         | 805          | --                      | --          | --          | --          |
| Irish Affected Sib Pair Study of Alcohol Dependence (IASPSAD)                       | 15770118 | 50%      | 17-84        | 721           | 1814         | 436          | 1802         | --                      | --          | --          | --          |
| Yale-Penn                                                                           | 24166409 | 51%      | 16-79        | --            | --           | --           | --           | 1607                    | 1070        | 1263        | 933         |
| <b>Summary statistics</b>                                                           |          |          |              |               |              |              |              |                         |             |             |             |
| Netherlands Study of Depression and Anxiety / Netherlands Twin Registry (NESDA/NTR) | 18197199 | 31%      | >18          | 390           | 1633         | 390          | 1633         | --                      | --          | --          | --          |
| Finnish Nicotine Addiction Genetics Project (NAG-Fin)                               | 17436240 | 52%      | 30-92        | 439           | 1137         | 439          | 1137         | --                      | --          | --          | --          |
| FinnTwin12 (FT12)                                                                   | 17254406 | 47%      | 20-27        | 88            | 874          | 88           | 874          | --                      | --          | --          | --          |
| National Longitudinal Study of Adolescent to Adult Health (Add Health)              | 25378290 | 47%      | 24-34        | 768           | 2981         | 768          | 2981         | --                      | --          | --          | --          |
| Helsinki Birth Cohort Study (HBCS)                                                  | 16251536 | 43%      | 56-70        | 36            | 1583         | 36           | 1583         | --                      | --          | --          | --          |
| <b>Total</b>                                                                        |          |          |              | <b>11569</b>  | <b>34999</b> | <b>10206</b> | <b>28480</b> | <b>3335</b>             | <b>2945</b> | <b>2991</b> | <b>2808</b> |

Overview of numbers of alcohol dependent cases and controls from each cohort in the current analysis, including the number of genetically unrelated individuals. Cohorts are listed by study design. Sample sizes are listed after QC exclusions and stratified by ancestry group. PubMed identifiers (PMID) are listed for previous publications describing each cohort, along with the percentage of male samples and the age range in the cohort.

**Table 2:** Top 10 loci from the discovery meta-analysis of alcohol dependence by ancestry

| SNP                                                                    | CHR | BP        | A1 | A2 | Gene            | A1 Allele Freq. |       | INFO score |       | Effect size |       | Discovery meta-analysis p-value |                 |                 |
|------------------------------------------------------------------------|-----|-----------|----|----|-----------------|-----------------|-------|------------|-------|-------------|-------|---------------------------------|-----------------|-----------------|
|                                                                        |     |           |    |    |                 | EU              | AA    | EU         | AA    | EU OR       | AA OR | EU                              | AA              | Trans           |
| <b>Trans-ancestral meta-analysis (14,904 cases, 37,944 controls)</b>   |     |           |    |    |                 |                 |       |            |       |             |       |                                 |                 |                 |
| rs1229984                                                              | 4   | 100239319 | T  | C  | <i>ADH1B</i>    | 0.040           | 0.014 | 0.904      | 0.910 | 0.486       | 0.912 | <b>9.79E-13</b>                 | 3.48E-01        | <b>2.18E-11</b> |
| rs1789912                                                              | 4   | 100263942 | T  | C  | <i>ADH1C</i>    | 0.418           | 0.132 | 1.000      | 1.020 | 1.106       | 1.211 | 1.98E-07                        | 1.32E-03        | <b>1.47E-09</b> |
| rs2066702                                                              | 4   | 100229017 | A  | G  | <i>ADH1B</i>    | --              | 0.215 | --         | 0.989 | --          | 0.731 | --                              | <b>2.21E-09</b> | <b>2.21E-09</b> |
| rs6827898                                                              | 4   | 100295863 | A  | G  | --              | 0.123           | 0.112 | 0.963      | 0.942 | 1.145       | 1.270 | 5.21E-07                        | 9.31E-04        | <b>2.97E-09</b> |
| rs7644567                                                              | 3   | 29201672  | A  | G  | <i>RBMS3</i>    | --              | 0.705 | --         | 0.997 | --          | 1.229 | --                              | 6.64E-06        | <b>1.36E-08</b> |
| rs894368                                                               | 4   | 100309313 | A  | C  | --              | 0.309           | 0.386 | 0.994      | 0.962 | 0.887       | 0.981 | <b>1.93E-08</b>                 | 9.73E-01        | 3.30E-07        |
| rs116338421                                                            | 8   | 145761256 | C  | G  | <i>ARHGAP39</i> | --              | 0.172 | --         | 0.974 | --          | 0.755 | --                              | 4.86E-07        | 4.86E-07        |
| rs79171978                                                             | 12  | 17798824  | C  | G  | --              | 0.099           | 0.027 | 0.989      | 0.986 | 1.201       | 1.016 | 5.47E-08                        | 8.18E-01        | 5.98E-07        |
| rs2461618                                                              | 7   | 68667233  | A  | G  | --              | --              | 0.088 | --         | 0.984 | --          | 0.669 | --                              | 6.30E-07        | 6.30E-07        |
| rs8017647                                                              | 14  | 32456358  | T  | C  | --              | 0.792           | 0.565 | 0.998      | 0.991 | 0.901       | 0.923 | 8.05E-06                        | 4.71E-02        | 1.03E-06        |
| <b>African ancestry meta-analysis (3,335 cases, 2,945 controls)</b>    |     |           |    |    |                 |                 |       |            |       |             |       |                                 |                 |                 |
| rs2066702                                                              | 4   | 100229017 | A  | G  | <i>ADH1B</i>    | --              | 0.215 | --         | 0.989 | --          | 0.731 | --                              | <b>2.21E-09</b> | <b>2.21E-09</b> |
| rs5781337                                                              | 1   | 223883425 | CA | C  | --              | 0.263           | 0.212 | 0.982      | 0.927 | 1.007       | 0.664 | 8.85E-01                        | 1.62E-07        | 6.59E-02        |
| rs116338421                                                            | 8   | 145761256 | C  | G  | <i>ARHGAP39</i> | --              | 0.172 | --         | 0.974 | --          | 0.755 | --                              | 4.86E-07        | 4.86E-07        |
| rs3857224                                                              | 4   | 100129685 | T  | C  | <i>ADH6</i>     | 0.315           | 0.585 | 0.994      | 1.000 | 0.970       | 0.814 | 2.40E-01                        | 5.86E-07        | 2.36E-03        |
| rs2461618                                                              | 7   | 68667233  | A  | G  | --              | --              | 0.088 | --         | 0.984 | --          | 0.669 | --                              | 6.30E-07        | 6.30E-07        |
| rs10784244                                                             | 12  | 62035165  | G  | A  | --              | 0.153           | 0.484 | 1.000      | 0.998 | 1.041       | 1.226 | 6.26E-02                        | 1.04E-06        | 2.49E-04        |
| rs17199739                                                             | 16  | 25444288  | G  | A  | --              | 0.176           | 0.096 | 0.993      | 0.955 | 0.994       | 0.693 | 4.25E-01                        | 1.11E-06        | 8.66E-03        |
| rs79016499                                                             | 11  | 93010988  | T  | C  | --              | --              | 0.066 | --         | 0.928 | --          | 1.729 | --                              | 1.36E-06        | --              |
| rs740793                                                               | 17  | 3846353   | G  | A  | <i>ATP2A3</i>   | 0.453           | 0.350 | 0.973      | 0.970 | 0.996       | 1.370 | 4.66E-01                        | 1.48E-06        | 3.44E-01        |
| rs143258048                                                            | 3   | 75982870  | A  | AC | <i>ROBO2</i>    | --              | 0.028 | --         | 0.879 | --          | 0.490 | --                              | 1.86E-06        | --              |
| <b>European ancestry meta-analysis (11,569 cases, 34,999 controls)</b> |     |           |    |    |                 |                 |       |            |       |             |       |                                 |                 |                 |
| rs1229984                                                              | 4   | 100239319 | T  | C  | <i>ADH1B</i>    | 0.040           | 0.014 | 0.904      | 0.910 | 0.486       | 0.912 | <b>9.79E-13</b>                 | 3.48E-01        | <b>2.18E-11</b> |
| rs894368                                                               | 4   | 100309313 | A  | C  | --              | 0.309           | 0.386 | 0.994      | 0.962 | 0.887       | 0.981 | <b>1.93E-08</b>                 | 9.73E-01        | 3.30E-07        |
| rs3811802                                                              | 4   | 100244221 | G  | A  | <i>ADH1B</i>    | 0.454           | 0.529 | 0.958      | 0.956 | 1.162       | 0.914 | <b>2.40E-08</b>                 | 2.19E-02        | 1.22E-04        |
| rs79171978                                                             | 12  | 17798824  | C  | G  | --              | 0.099           | 0.027 | 0.989      | 0.986 | 1.201       | 1.016 | 5.47E-08                        | 8.18E-01        | 5.98E-07        |
| rs1154445                                                              | 4   | 100288521 | G  | T  | --              | 0.425           | 0.134 | 0.970      | 0.986 | 1.137       | 1.211 | 1.80E-07                        | 2.63E-02        | <b>1.48E-08</b> |
| rs6827898                                                              | 4   | 100295863 | A  | G  | --              | 0.123           | 0.112 | 0.963      | 0.942 | 1.145       | 1.270 | 5.21E-07                        | 9.31E-04        | <b>2.97E-09</b> |
| rs4388946                                                              | 12  | 17935154  | C  | A  | --              | 0.240           | 0.297 | 0.988      | 0.976 | 1.137       | 0.950 | 7.14E-07                        | 1.87E-01        | 7.05E-05        |
| rs1229863                                                              | 4   | 100252386 | A  | T  | <i>ADH1B</i>    | 0.174           | 0.038 | 0.990      | 0.989 | 1.145       | 1.254 | 7.80E-07                        | 4.26E-02        | 9.28E-08        |
| rs34929220                                                             | 15  | 69769635  | T  | C  | <i>DRAIC</i>    | 0.690           | 0.937 | 0.898      | 0.943 | 0.893       | 1.028 | 1.02E-06                        | 8.38E-01        | 7.38E-06        |
| rs113659074                                                            | 4   | 100252308 | T  | G  | <i>ADH1B</i>    | 0.068           | 0.093 | 0.980      | 0.947 | 0.800       | 1.166 | 1.54E-06                        | 6.63E-02        | 2.99E-04        |

Top 10 nominally independent variants from the discovery trans-ancestral (Trans.) meta-analysis and the discovery meta-analyses in African (AA) and European (EU) ancestry cohorts, respectively. Independent variants are identified based on clumping for LD (pairwise  $r^2 < 0.1$ ) in 1000 Genomes Project Phase 3 data<sup>25</sup>. EU results are clumped using European (EUR) ancestry reference samples, AA results are clumped using African ancestry reference samples from the American Southwest (ASW), and trans-ancestral results are clumped using merged EUR and African ancestry (AFR) reference samples. Meta-analysis p-values and allele frequencies (Freq.) are reported from full discovery meta-analyses. Bold indicates genome-wide significant p-values ( $p < 5e-8$ ). Odds ratios (OR) and INFO scores are reported from the meta-analyses of the subset of unrelated individuals within each ancestry. Chromosome (CHR) and base pair (BP) position are reported for genome build hg19, with genes annotated by Ensembl VEP<sup>62</sup>. Allele frequency and OR are given with respect to allele 1 (A1).



**Figure 1:** Manhattan plot of discovery trans-ancestral meta-analysis showing strong evidence for rs1229984 in *ADH1B*.

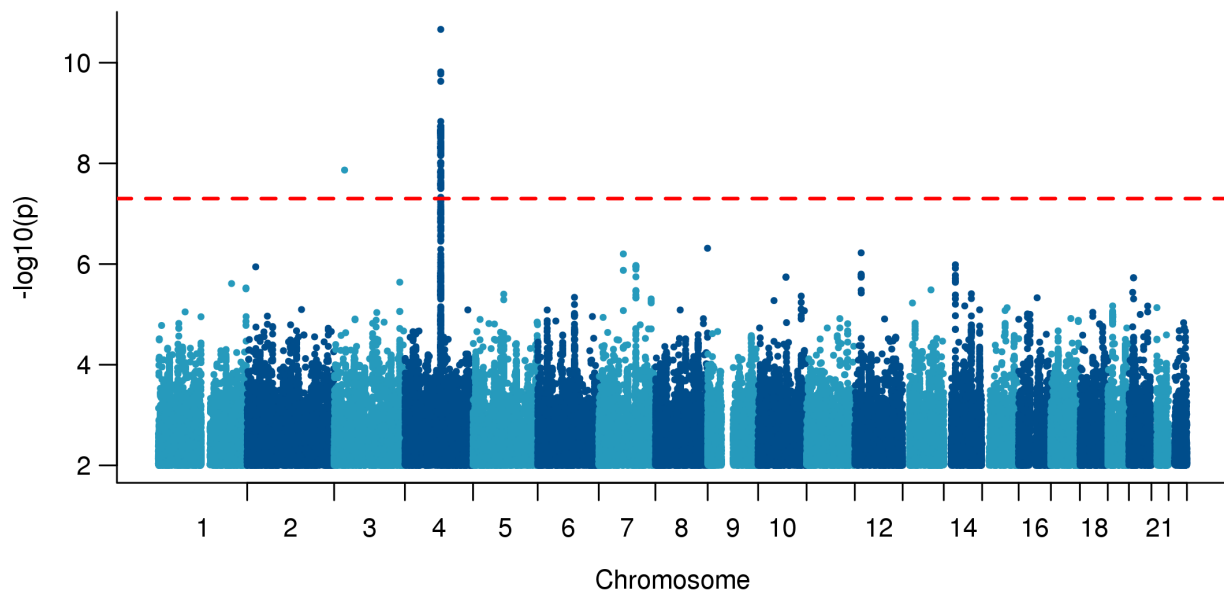

Dashed red reference line indicates genome-wide significance ( $p < 5E-8$ ). Results are from the discovery meta-analysis of all cohorts (14,904 cases, 37,994 controls) under a fixed effects model weighted by effective sample size.

**Figure 2:** Regional plots for the *ADH1B* locus, rs1229984, in the European (EU), African-American (AA) and trans-ancestral discovery meta-analysis.

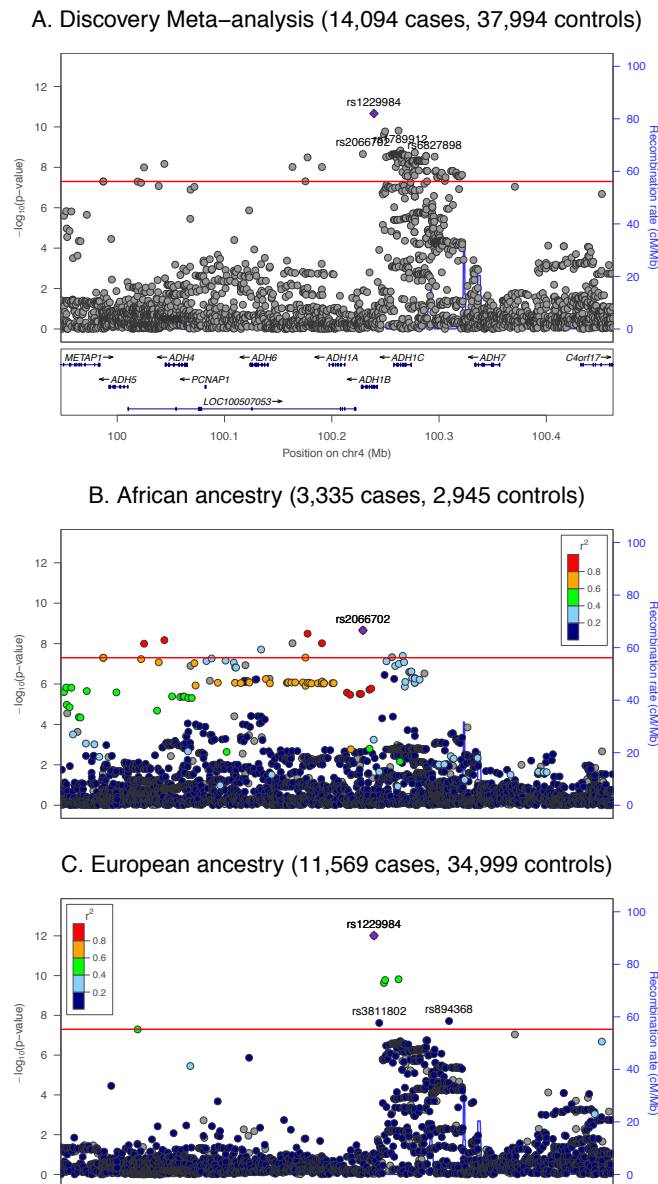

Results of meta-analysis with effective sample size weights for the *ADH1B* locus in (A) all cohorts, (B) AA cohorts, and (C) EU cohorts. Red reference line indicates the genome-wide significance threshold ( $P < 5e-8$ ). Within ancestry, colored points reflect the degree of LD (pairwise  $r^2$ ) to the index variant (indicated by a purple diamond) in 1000 Genomes Project reference data<sup>25</sup> for individuals of (B) African or (C) European ancestry, respectively. No reference LD panel exists for the trans-ancestral sample (A).

**Figure 3:** Genetic correlations between 42 traits and alcohol dependence in Europeans.

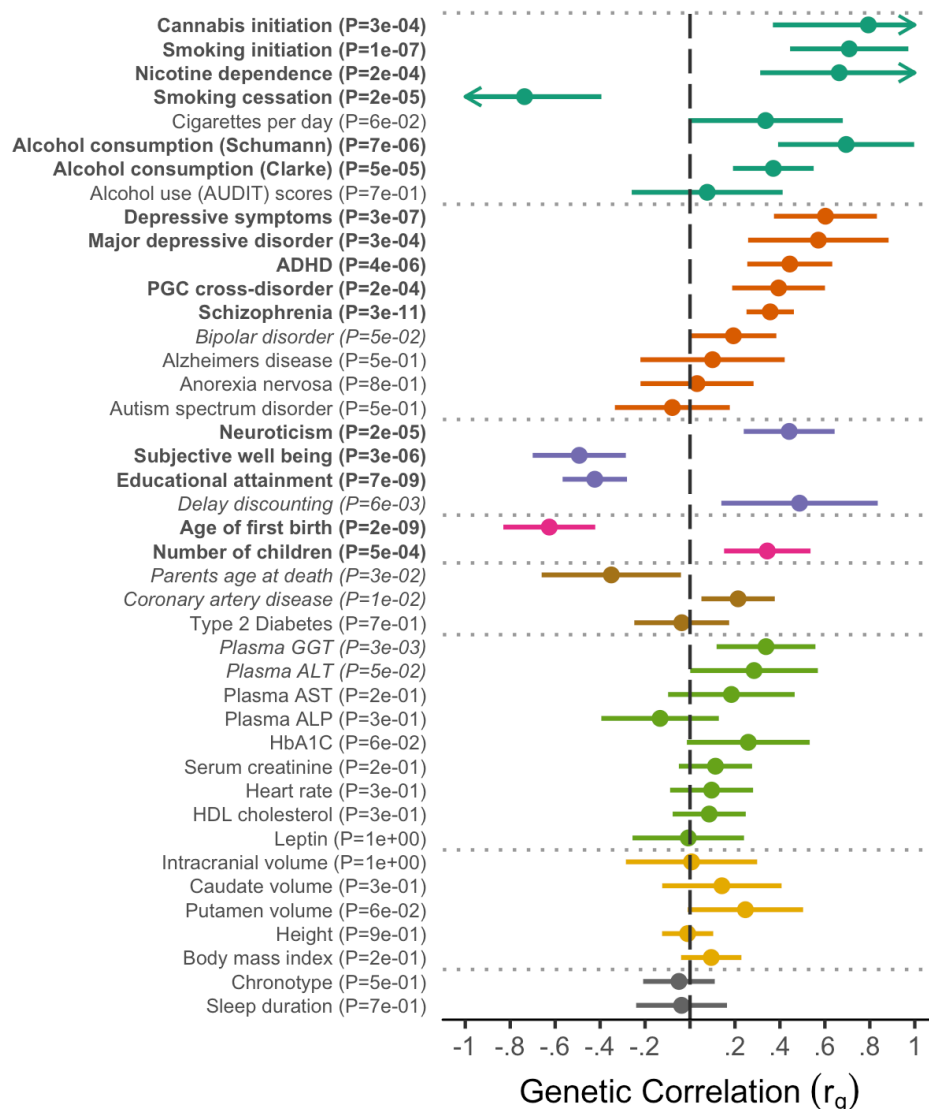

Genetic correlation results from LD score regression with the meta-analysis of AD in unrelated EU individuals (10,206 cases, 28,480 controls). After Bonferroni correction, significant correlations are observed with 16 traits and disorders ( $p < 1.2E-3$ ); bold), with nominally significant results for 6 additional traits and disorders ( $p < .05$ ; italics). Error bars indicate 95% confidence intervals, with arrows indicating intervals extending above 1 or below -1. Phenotypes are organized by research domain.

### **Ethics statement:**

This study was approved by the institutional review board (IRB) of Washington University in St. Louis (Human Research Protection Office; number 201512068). Each contributing cohort obtained informed consent from their participants and received ethics approvals of their study protocols from their respective review boards in accordance with applicable regulations.

### **Contributors:**

The 23andMe research team includes Michelle Agee, Babak Alipanahi, Adam Auton, Robert K. Bell, Katarzyna Bryc, Sarah L. Elson, Pierre Fontanillas, Nicholas A. Furlotte, David A. Hinds, Karen E. Huber, Aaron Kleinman, Nadia K. Litterman, Jennifer C. McCreight, Matthew H. McIntyre, Joanna L. Mountain, Elizabeth S. Noblin, Carrie A.M. Northover, Steven J. Pitts, J. Fah Sathirapongsasuti, Olga V. Sazonova, Janie F. Shelton, Suyash Shringarpure, Chao Tian, Joyce Y. Tung, Vladimir Vacic, and Catherine H. Wilson

### **Data availability:**

Summary statistics from the genome-wide meta-analyses will be made available on the Psychiatric Genomics Consortium's downloads page (<http://www.med.unc.edu/pgc/results-and-downloads>). Individual-level data from the genotyped cohorts and cohort-level summary statistics will be made available to researchers following an approved analysis proposal through the PGC Substance Use Disorder group with agreement of the cohort PIs; contact the corresponding authors for details. Cohort data is also available from dbGaP except where prohibited by IRB or European Union data restrictions (accession numbers to be available before publication).

### **Code availability:**

Code for GWAS of case/control cohorts with ricopili is available at <https://github.com/Nealelab/ricopili>. Code for GWAS of family-based cohorts with picopili is available at <https://github.com/Nealelab/picopili>. Code for LD score regression analyses are available at <https://github.com/bulik/ldsc>. Effective sample size calculations were implemented using PLINK (<https://www.cog-genomics.org/plink2>), and GMMAT (<https://content.sph.harvard.edu/xlin/software.html#gmmat>) and geepack (<https://cran.r-project.org/web/packages/geepack/index.html>) in R (<https://cran.r-project.org/>); example code is available from the first author by request.

## References

1. World Health Organization. *Global Status Report on Alcohol and Health, 2014*. World Health Organization; 2014.
2. American Psychiatric Association. American Psychiatric Association: Diagnostic and Statistical Manual of Mental Disorders, Fourth Edition, Text Revision. *Am Psychiatr Assoc*. 2000. doi:10.1176/appi.books.9780890423349
3. Hasin D, Stinson F, Ogburn E, Grant B. Prevalence, correlates, disability, and comorbidity of DSM-IV alcohol abuse and dependence in the United States: Results from the national epidemiologic survey on alcohol and related conditions. *Arch Gen Psychiatry*. 2007;64(7):830-842.
4. Dawson DA, Grant BF, Stinson FS, Chou PS. Estimating the effect of help-seeking on achieving recovery from alcohol dependence. *Addiction*. 2006;101(6):824-834.
5. Dawson DA, Grant BF, Stinson FS, Chou PS, Huang B, Ruan W. Recovery from DSM-IV alcohol dependence: United States, 2001–2002. *Addiction*. 2005;100(3):281-292.
6. Verhulst B, Neale MC, Kendler KS. The heritability of alcohol use disorders: a meta-analysis of twin and adoption studies. *Psychol Med*. 2015;45(5):1061-1072.
7. Hart AB, Kranzler HR. Alcohol Dependence Genetics: Lessons Learned From Genome-Wide Association Studies (GWAS) and Post-GWAS Analyses. *Alcohol Clin Exp Res*. 2015;39(8):1312-1327.
8. Palmer RHC, McGeary JE, Heath AC, Keller MC, Brick LA, Knopik VS. Shared additive genetic influences on DSM-IV criteria for alcohol dependence in subjects of European ancestry. *Addiction*. 2015;110(12):1922-1931.
9. Thomasson HR, Edenberg HJ, Crabb DW, et al. Alcohol and aldehyde dehydrogenase genotypes and alcoholism in Chinese men. *Am J Hum Genet*. 1991;48(4):677.
10. Edenberg HJ. The Genetics of Alcohol Metabolism: Role of Alcohol Dehydrogenase and Aldehyde Dehydrogenase Variants. *Alcohol Res Heal*. 2007;30(1):5-13.
11. Hurley TD, Edenberg HJ. Genes Encoding Enzymes Involved in Ethanol Metabolism. *Alcohol Res*. 2012;34(3):339-344.
12. Luczak SE, Glatt SJ, Wall TJ. Meta-analyses of ALDH2 and ADH1B with alcohol dependence in Asians. 2006.
13. Li D, Zhao H, Gelernter J. Strong association of the alcohol dehydrogenase 1B gene (ADH1B) with alcohol dependence and alcohol-induced medical diseases. *Biol Psychiatry*. 2011;70(6):504-512.
14. Bierut LJ, Goate AM, Breslau N, et al. ADH1B is associated with alcohol dependence and alcohol consumption in populations of European and African

- ancestry. *Mol Psychiatry*. 2012;17(4):445.
15. Frank J, Cichon S, Treutlein J, et al. Genome-wide significant association between alcohol dependence and a variant in the ADH gene cluster. *Addict Biol*. 2012;17(1):171-180.
  16. Hart AB, Lynch KG, Farrer L, Gelernter J, Kranzler HR. Which alcohol use disorder criteria contribute to the association of ADH1B with alcohol dependence? *Addict Biol*. 2016;21(4):924-938.
  17. Li D, Zhao H, Gelernter J. Strong protective effect of the aldehyde dehydrogenase gene (ALDH2) 504lys (\* 2) allele against alcoholism and alcohol-induced medical diseases in Asians. *Hum Genet*. 2012;131(5):725-737.
  18. Crabb DW, Edenberg HJ, Bosron WF, Li T-K. Genotypes for aldehyde dehydrogenase deficiency and alcohol sensitivity. The inactive ALDH2 (2) allele is dominant. *J Clin Invest*. 1989;83(1):314.
  19. Meyers JL, Shmulewitz D, Aharonovich E, et al. Alcohol-Metabolizing Genes and Alcohol Phenotypes in an Israeli Household Sample. *Alcohol Clin Exp Res*. 2013;37(11):1872-1881.
  20. Macgregor S, Lind PA, Bucholz KK, et al. Associations of ADH and ALDH2 gene variation with self report alcohol reactions, consumption and dependence: an integrated analysis. *Hum Mol Genet*. 2008;18(3):580-593.
  21. Luo X, Kranzler HR, Zuo L, Lappalainen J, Yang B, Gelernter J. ADH4 gene variation is associated with alcohol dependence and drug dependence in European Americans: results from HWD tests and case-control association studies. *Neuropsychopharmacology*. 2006;31(5):1085-1095.
  22. Edenberg HJ, Xuei X, Chen H-J, et al. Association of alcohol dehydrogenase genes with alcohol dependence: a comprehensive analysis. *Hum Mol Genet*. 2006;15(9):1539-1549.
  23. Gelernter J, Kranzler HR, Sherva R, et al. Genome-wide association study of alcohol dependence: significant findings in African- and European-Americans including novel risk loci. *Mol Psychiatry*. 2014;19(1):41-49.  
doi:10.1038/mp.2013.145
  24. Polimanti R, Gelernter J. ADH1B: From alcoholism, natural selection, and cancer to the human phenome. *Am J Med Genet Part B Neuropsychiatr Genet*. 2017.
  25. Consortium T 1000 GP. A global reference for human genetic variation. *Nature*. 2015;526(7571):68-74.
  26. O'Connell J, Gurdasani D, Delaneau O, et al. A General Approach for Haplotype Phasing across the Full Spectrum of Relatedness. *PLoS Genet*. 2014;10(4):e1004234.
  27. Howie BN, Donnelly P, Marchini J. A flexible and accurate genotype imputation method for the next generation of genome-wide association studies. *PLoS Genet*. 2009;5(6):e1000529.

28. Willer CJ, Li Y, Abecasis GR. METAL: fast and efficient meta-analysis of genomewide association scans. *Bioinformatics*. 2010;26(17):2190-2191.
29. Skol AD, Scott LJ, Abecasis GR, Boehnke M. Joint analysis is more efficient than replication-based analysis for two-stage genome-wide association studies. *Nat Genet*. 2006;38(2):209-213.
30. Han B, Eskin E. Random-effects model aimed at discovering associations in meta-analysis of genome-wide association studies. *Am J Hum Genet*. 2011;88(5):586-598.
31. Morris AP. Transethnic Meta-Analysis of Genomewide Association Studies. *Genet Epidemiol*. 2011;35(8):809-822.
32. Bulik-Sullivan BK, Loh P-R, Finucane HK, et al. LD Score regression distinguishes confounding from polygenicity in genome-wide association studies. *Nat Genet*. 2015;47(3):291-295.
33. Zheng J, Erzurumluoglu AM, Elsworth BL, et al. LD Hub: a centralized database and web interface to perform LD score regression that maximizes the potential of summary level GWAS data for SNP heritability and genetic correlation analysis. *Bioinformatics*. 2017;33(2):272-279. doi:10.1093/bioinformatics/btw613
34. Stringer S, Minică CC, Verweij KJH, et al. Genome-wide association study of lifetime cannabis use based on a large meta-analytic sample of 32 330 subjects from the International Cannabis Consortium. *Transl Psychiatry*. 2016;6:e769. doi:10.1038/tp.2016.36
35. Hancock DB, Guo Y, Reginsson GW, et al. Genome-wide association study across European and African American ancestries identifies a SNP in DNMT3B contributing to nicotine dependence. *Mol Psychiatry*. 2017. doi:10.1038/mp.2017.193
36. Schumann G, Liu C, O'Reilly P, et al. KLB is associated with alcohol drinking, and its gene product  $\beta$ -Klotho is necessary for FGF21 regulation of alcohol preference. *Proc Natl Acad Sci USA*. 2016;113(50):14372-14377.
37. Clarke T-K, Adams MJ, Davies G, et al. Genome-wide association study of alcohol consumption and genetic overlap with other health-related traits in UK Biobank (N=112,117). *Mol Psychiatry*. July 2017. doi:10.1038/mp.2017.153
38. Sanchez-Roige S, Fontanillas P, Elson SL, et al. Genome-wide association study of Alcohol Use Disorder Identification Test (AUDIT) scores in 20,328 research participants of European ancestry. *Addict Biol*. 2017. doi:10.1111/adb.12574
39. Demontis D, Walters RK, Martin J, et al. Discovery Of The First Genome-Wide Significant Risk Loci For ADHD. *bioRxiv*. 2017:145581. doi:10.1101/145581
40. Duncan L, Yilmaz Z, Gaspar H, et al. Significant locus and metabolic genetic correlations revealed in genome-wide association study of anorexia nervosa. *Am J Psychiatry*. 2017;174(9):850-858. doi:10.1176/appi.ajp.2017.16121402
41. Anney RJL, Ripke S, Anttila V, et al. Meta-analysis of GWAS of over 16,000



- individuals with autism spectrum disorder highlights a novel locus at 10q24.32 and a significant overlap with schizophrenia. *Mol Autism*. 2017;8(1). doi:10.1186/s13229-017-0137-9
42. Sanchez-Roige S, Fontanillas P, Elson SL, et al. Genome-wide association study of delay discounting in 23,217 adult research participants of European ancestry. *Nat Neurosci*. 2018;21:16-18.
  43. Hibar DP, Stein JL, Renteria ME, et al. Common genetic variants influence human subcortical brain structures. *Nature*. 2015;520(7546):224-229. doi:10.1038/nature14101
  44. Chambers JC, Zhang W, Sehmi J, et al. Genome-wide association study identifies loci influencing concentrations of liver enzymes in plasma. *Nat Genet*. 2011;43(11):1131-1138. doi:10.1038/ng.970
  45. Firth D. Bias Reduction of Maximum-Likelihood-Estimates. *Biometrika*. 1993;80(1):27-38. doi:10.1093/biomet/80.1.27
  46. de Leeuw CA, Mooij JM, Heskes T, Posthuma D. MAGMA: Generalized Gene-Set Analysis of GWAS Data. *PLoS Comput Biol*. 2015;11(4). doi:10.1371/journal.pcbi.1004219
  47. Dudbridge F, Gusnanto A. Estimation of Significance Thresholds for Genomewide Association Scans. *Genet Epidemiol*. 2008;32:227-234.
  48. Pe'er I, Yelensky R, Altshuler D, Daly MJ. Estimation of the Multiple Testing Burden for Genomewide Association Studies of Nearly All Common Variants. *Genet Epidemiol*. 2008;32(4):381-385.
  49. Fry A, Littlejohns TJ, Sudlow C, et al. Comparison of Sociodemographic and Health-Related Characteristics of UK Biobank Participants With Those of the General Population. *Am J Epidemiol*. 2017.
  50. Koob GF, Volkow ND. Neurobiology of addiction: a neurocircuitry analysis. *The Lancet Psychiatry*. 2016;3(8):760-773. doi:10.1016/S2215-0366(16)00104-8
  51. Mbarek H, Milaneschi Y, Fedko IO, et al. The genetics of alcohol dependence: Twin and SNP-based heritability, and genome-wide association study based on AUDIT scores. *Am J Med Genet Part B Neuropsychiatr Genet*. 2015;168(8):739-748.
  52. Prescott CA, Aggen S, Kendler KS. Sex-specific genetic influences on the comorbidity of alcoholism and major depression in a population-based sample of us twins. *Arch Gen Psychiatry*. 2000;57(8):803-811.
  53. Kendler KS, Prescott CA, Myers J, Neale MC. The structure of genetic and environmental risk factors for common psychiatric and substance use disorders in men and women. *Arch Gen Psychiatry*. 2003;60(9):929-937.
  54. Andersen AM, Pietrzak RH, Kranzler HR, et al. Polygenic scores for major depressive disorder and risk of alcohol dependence. *JAMA Psychiatry*. 2017;74(11):1153-1160.

55. Zhou HP, Yang B, Wang Q, et al. Genetic Risk Variants Associated With Comorbid Alcohol Dependence and Major Depression. *JAMA Psychiatry*. 2017. doi:10.1001/jamapsychiatry.2017.3275
56. Barban N, Jansen R, de Vlaming R, et al. Genome-wide analysis identifies 12 loci influencing human reproductive behavior. *Nat Genet*. 2016;48(12):1462-1472.
57. Polimanti R, Wang Q, Meda SA, et al. The Interplay Between Risky Sexual Behaviors and Alcohol Dependence: Genome-Wide Association and Neuroimaging Support for LHPP as a Risk Gene. *Neuropsychopharmacology*. 2017;42(3):598-605.
58. Pratt DS, Kaplan MM. Evaluation of Abnormal Liver-Enzyme Results in Asymptomatic Patients. *N Eng J Med*. 2000;342:1266-1271.
59. Polimanti R, Zhang H, Smith AH, et al. Genome-wide association study of body mass index in subjects with alcohol dependence. *Addict Biol*. 2017;22(2):535-549. doi:10.1111/adb.12317
60. Traversy G, Chaput J-P. Alcohol Consumption and Obesity: An Update. *Curr Obes Rep*. 2015;4(1):122-130. doi:10.1007/s13679-014-0129-4
61. Wray NR, Ripke S, Mattheisen M, et al. Genome-wide association analyses identify 44 risk variants and refine the genetic architecture of major depressive disorder. *bioRxiv*. 2017.
62. Aken BL, Achuthan P, Akanni W, et al. Ensembl 2017. *Nucleic Acids Res*. 2017;45(D1):D635-D642. doi:10.1093/nar/gkw1104
